# Supplementary material
Source: publisher figshare collection journal article supplement (https://gsajournals.figshare.com/articles/dataset/_/14537895)
Supplement: Supplementary file 2 [file 1]

**Supplemental Table 1: List of strains and alleles**

| Strain Name | Genotype                                                 |
|-------------|----------------------------------------------------------|
| HR1157      | <i>let-502(sb118ts) I</i>                                |
| HR1440      | <i>pak-1(ok448) X</i>                                    |
| HR1500      | <i>let-502(sb118ts) I; pak-1(ok448) X</i>                |
| HR604       | <i>mel-11(it26ts) unc-4(e120)/mC1 II</i>                 |
| HR1237      | <i>let-502(sb118ts) I; mel-11(it26ts) unc-4(e120) II</i> |
| XA8001      | <i>fhod-1(tm2363) I</i>                                  |
| HR1485      | <i>let-502(sb118ts) fhod-1(tm2363) I</i>                 |
| HR1237      | <i>let-502(sb118ts) I; mel-11(it26ts) unc-4(e120) II</i> |
| HR1637      | <i>let-502(sb118ts) unc-57(ad592) rga-2(hd102) I</i>     |
| HR1655      | <i>rga-2(hd102) I</i>                                    |
| HR1214      | <i>rhgf-2(sb100) II</i>                                  |
| HR1641      | <i>rga-2(hd102) I; rhgf-2(gk216) II</i>                  |
| HR1888      | <i>rga-1(hd102) I; rhgf-2(gk216) III; pak-1(ok448) X</i> |
| HR1891      | <i>pix-1(ok982) X</i>                                    |

**Supplemental Table 2: List of primers**

| Primer | Sequence                                  | Use                                             |
|--------|-------------------------------------------|-------------------------------------------------|
| oED1   | <u>tgccggccgc</u> ATGGAGCAGGATGAGCTGC     | <i>let-502</i> cDNA forward                     |
| oED2   | <u>ggggatcgat</u> TTGATAGATTGTGGAAGAGTTTG | <i>let-502</i> cDNA reverse                     |
| oED37  | TGCAACACTTTGCTGATAGGC                     | <i>let-502</i> fragment 1 cDNA reverse          |
| oED36  | CCAAAGAGTACAATAGTGAGATGG                  | <i>let-502</i> fragment 2 cDNA forward          |
| oED3   | <u>accgcg</u> GGCGAACAAATAAAGAGAAAGG      | <i>let-502</i> promoter forward                 |
| oED4   | <u>agcggccgc</u> GGCTGCAGCTCGATTTTC       | <i>let-502</i> promoter reverse                 |
| oED41  | <u>ggcggccgc</u> ATGGGTCAAGATGACGAGG      | <i>mel-11</i> cDNA forward                      |
| oED6   | <u>ggctgcag</u> GATGGTCATCTTCGATATGAC     | <i>mel-11</i> cDNA reverse                      |
| oED7   | <u>ggcggccgc</u> GCTCCATCTATACACTTCTCTCC  | <i>mel-11</i> promoter forward                  |
| oED8   | <u>ggggatcc</u> TCTGCAAAATATGAAATTTTTTTAG | <i>mel-11</i> promoter reverse                  |
| oED9   | <u>ggcggccgc</u> ATGAAAGCTTTCTCATCGTATG   | <i>pak-1</i> cDNA f                             |
| oED10  | <u>ggctgcag</u> TGAGTTGCTAGCTTCGGC        | <i>pak-1</i> cDNA reverse                       |
| oED11  | <u>gccgcgg</u> CAACATGAACGGGAGTATCAC      | <i>pak-1</i> promoter forward                   |
| oED12  | <u>ggcggccgc</u> TTTGGCAAGCCTGGAAAATTG    | <i>pak-1</i> promoter reverse                   |
| oED13  | <u>gccgcgg</u> CGTTAAATGCTCCAATAAAGTTT    | <i>elt-3</i> ( <i>SacII</i> ) promoter forward  |
| oED14  | <u>ggcggccgc</u> TTGAATTCTGTAAGTAAAATTG   | <i>elt-3</i> ( <i>SacII</i> ) promoter reverse  |
| oED15  | <u>ggcggccgc</u> CGTTAAATGCTCCAATAAAGTTT  | <i>elt-3</i> ( <i>BamHI</i> ) promoter forward  |
| oED16  | <u>tttgatcc</u> TTGAATTCTGTAAGTAAAATTG    | <i>elt-3</i> ( <i>BamHI</i> ) promoter reverse  |
| oED17  | <u>gccgcgg</u> CAATGCTACAGGTTCTAACTAC     | <i>ceh-16</i> ( <i>SacII</i> ) promoter forward |
| oED18  | <u>ggcggccgc</u> CCCCGCTCTAAGGAAGCT       | <i>ceh-16</i> ( <i>SacII</i> ) promoter reverse |
| oED19  | <u>ggcggccgc</u> CAATGCTACAGGTTCTAACTAC   | <i>ceh-16</i> ( <i>BamHI</i> ) promoter forward |

|        |                                                |                                                 |
|--------|------------------------------------------------|-------------------------------------------------|
| oED20  | ttt <u>ggatcc</u> CCCCGCTCTAAGGAAGCT           | <i>ceh-16</i> ( <i>Bam</i> HI) promoter reverse |
| oED21b | ggg <u>gtacc</u> GTGTGCGGTTTTTTCTATGATG        | <i>unc-54</i> 3'- <i>utr</i> reverse            |
| oED22  | gggg <u>atcgat</u> ATGAGTAAAGGAGAAGAAGAACTTTTC | <i>gfp</i> cDNA ( <i>Cl</i> aI) forward         |
| oED23  | gg <u>ctgcag</u> ATGAGTAAAGGAGAAGAAGAACTTTTC   | <i>gfp</i> cDNA ( <i>Pst</i> I) forward         |

---

**Supplemental Table 3: Restriction enzymes used for cloning**

| Insert                            | Restriction Enzymes         |
|-----------------------------------|-----------------------------|
| <i>unc-54</i> 3'-utr:: <i>gfp</i> | <i>Kpn</i> I, <i>Cla</i> I  |
| <i>unc-54</i> 3'-utr:: <i>gfp</i> | <i>Kpn</i> I, <i>Pst</i> I  |
| <i>let-502</i> cDNA               | <i>Cla</i> I, <i>Not</i> I  |
| <i>mel-11</i> cDNA                | <i>Pst</i> I, <i>Not</i> I  |
| <i>pak-1</i> cDNA                 | <i>Pst</i> I, <i>Not</i> I  |
| <i>let-502</i> promoter           | <i>Not</i> I, <i>Sac</i> II |
| <i>elt-3</i> promoter             | <i>Not</i> I, <i>Sac</i> II |
| <i>ceh-16</i> promoter            | <i>Not</i> I, <i>Sac</i> II |
| <i>mel-11</i> promoter            | <i>Bam</i> HI, <i>Not</i> I |
| <i>elt-3</i> promoter             | <i>Bam</i> HI, <i>Not</i> I |
| <i>ceh-16</i> promoter            | <i>Bam</i> HI, <i>Not</i> I |
| <i>pak-1</i> promoter             | <i>Not</i> I, <i>Sac</i> II |
| <i>elt-3</i> promoter             | <i>Not</i> I, <i>Sac</i> II |
| <i>ceh-16</i> promoter            | <i>Not</i> I, <i>Sac</i> II |

**Supplemental Table 4: List of transgenic lines**

| Transgene / Strain      | Description                                                                       |
|-------------------------|-----------------------------------------------------------------------------------|
| <i>sbEx206</i> / HR1807 |                                                                                   |
| <i>sbEx207</i> / HR1808 | <i>[pceh-16::let-502::gfp::unc-54 3'-utr; rol-6(su1006); elt-2::gfp]; let-</i>    |
| <i>sbEx208</i> / HR1809 | <i>502(sb118ts) I</i>                                                             |
| <i>sbEx209</i> / HR1810 | Rescues embryonic arrest                                                          |
| <i>sbEx201</i> / HR1811 |                                                                                   |
| <i>sbEx212</i> / HR1818 | <i>[pelt-3::let-502::gfp::unc-54 3'-utr; rol-6(su1006); elt-2::gfp]; let-</i>     |
| <i>sbEx213</i> / HR1819 | <i>502502(sb118ts) I</i>                                                          |
|                         | Does not rescue embryonic arrest                                                  |
| <i>sbEx211</i> / HR1812 | <i>[ppak-1::pak-1::gfp::unc-54 3'-utr; elt-2::gfp; myo-2::mCherry]; let-</i>      |
|                         | <i>502502(sb118ts) I; pak-1(ok448) X</i>                                          |
|                         | Rescues embryonic arrest                                                          |
| <i>sbEx228</i> / HR1874 |                                                                                   |
| <i>sbEx231</i> / HR1877 | <i>[ppak-1::pak-1::gfp::unc-54 3'-utr; sur-5::gfp]; let-502(sb118ts) I; pak-</i>  |
| <i>sbEx232</i> / HR1878 | <i>1(ok448) X</i>                                                                 |
| <i>sbEx233</i> / HR1879 | Rescues embryonic arrest                                                          |
| <i>sbEx234</i> / HR1896 | <i>[pelt-3::pak-1::gfp::unc-54 3'-utr; sur-5::gfp]; let-502(sb118ts) I; pak-</i>  |
| <i>sbEx235</i> / HR1897 | <i>1(ok448) X</i>                                                                 |
| <i>sbEx236</i> / HR1898 | Does not rescue embryonic arrest                                                  |
| <i>sbEx241</i> / HR1904 | <i>[pceh-16::pak-1::gfp::unc-54 3'-utr; sur-5::gfp]; let-502(sb118ts) I; pak-</i> |
| <i>sbEx250</i> / HR1929 | <i>1(ok448) X</i>                                                                 |
| <i>sbEx252</i> / HR1931 | Does not rescue embryonic arrest                                                  |

|                         |                                                                                                                           |
|-------------------------|---------------------------------------------------------------------------------------------------------------------------|
| <i>sbEx253</i> / HR1932 |                                                                                                                           |
| <i>sbEx254</i> / HR1938 | <i>[pmel-11::mel-11::gfp::unc-54 3'-utr; rol-6(su1006)]; mel-11(it26ts) II</i><br>Rescues embryonic arrest                |
| <i>sbEx255</i> / HR1939 |                                                                                                                           |
| <i>sbEx256</i> / HR1940 |                                                                                                                           |
| <i>sbEx257</i> / HR1941 | <i>[pceh-16::mel-11::gfp::unc-54 3'-utr; rol-6(su1006)]; mel-11(it26ts) II</i><br>Little or no rescue of embryonic arrest |
| <i>sbEx258</i> / HR1942 |                                                                                                                           |
| <i>sbEx259</i> / HR1943 | <i>[pelt-3::mel-11::gfp::unc-54 3'-utr; rol-6(su1006)]; mel-11(it26ts) II</i><br>Little or no rescue of embryonic arrest  |
| <i>sbEx260</i> / HR1944 |                                                                                                                           |
